# Supplementary material for: Fabrication and catalytic properties of nanorod-shaped (Pt–Pd)/CeO2 composites
Source: Royal Society of Chemistry journal article supplement (doi:10.1039/d2ra07395a), 2023-01-01
Supplement: d2ra07395a1.pdf [file d2ra07395a1.pdf]

## Supporting Information

### **Fabrication and catalytic property of nanorod-shaped (Pt-Pd)/CeO<sub>2</sub> composites**

Haiyang Wang<sup>a,1</sup>, Wenyuan Duan<sup>a,1</sup>, Ruiyin Zhang<sup>a</sup>, Hao Ma<sup>a</sup>, Cheng Ma<sup>a</sup>, Miaomiao Liang<sup>b</sup>, Yuzhen Zhao<sup>a</sup>, Zongcheng Miao<sup>a,c,\*</sup>

<sup>a</sup> Xi'an Key Laboratory of Advanced Photo-electronics Materials and Energy Conversion Device, Key Laboratory of Organic Polymer Photoelectric Materials, School of Electronic Information, Xijing University, Xi'an, 710123, PR China

<sup>b</sup> School of Materials Science and Engineering, Xi'an Polytechnic University, Xi'an, Shaanxi, 710048, P.R. China

<sup>c</sup> School of Artificial Intelligence, Optics and Electronics (iOPEN), Northwestern Polytechnical University, Xi'an, Shaanxi, 710072, P.R. China

<sup>1</sup> These authors contributed equally to this work.

\* E-mail: miaozongcheng@nwpu.edu.cn

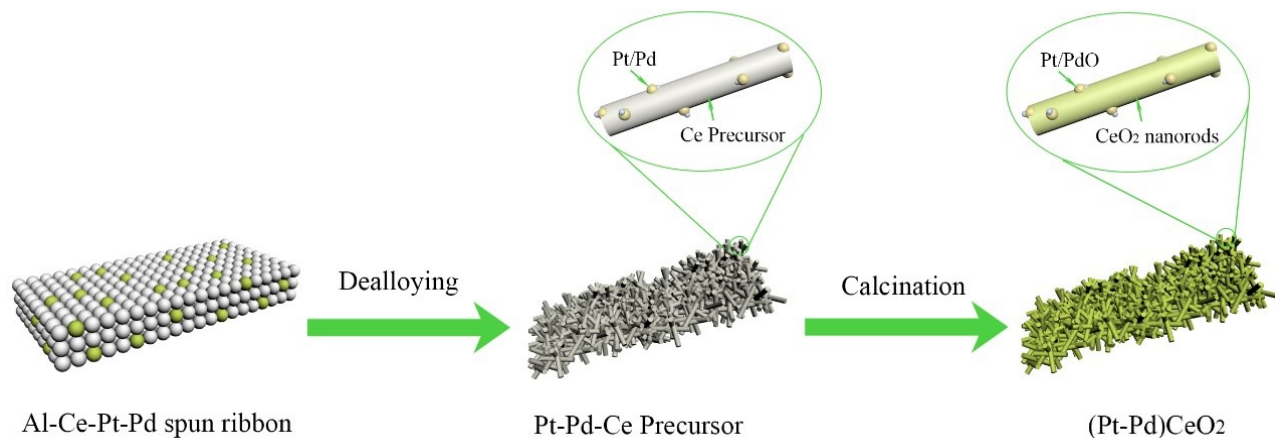

Fig. S1 Fabrication schematic of (Pt-Pd)/CeO<sub>2</sub>

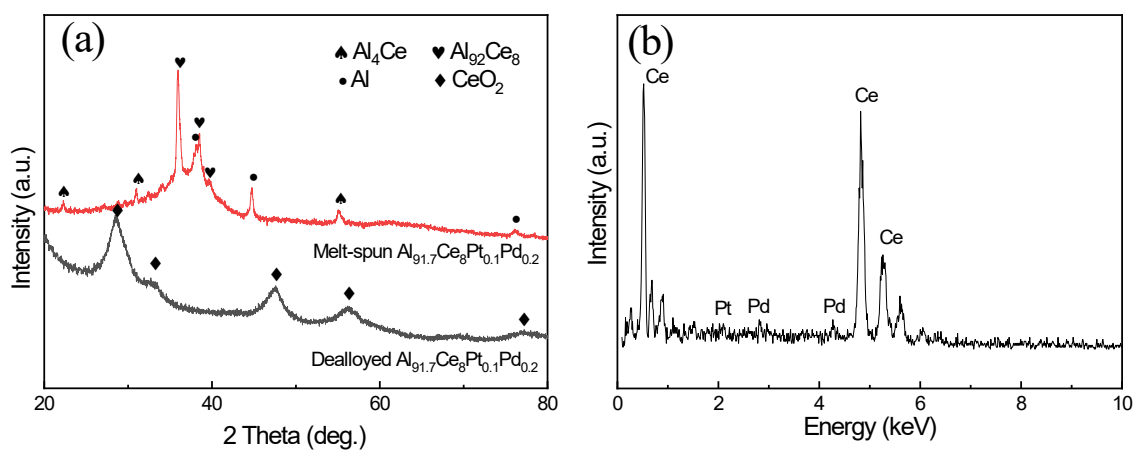

Fig. S2 (a) XRD patterns of melt-spun Al-Ce-Pt-Pd ribbons and dealloyed Al<sub>91.7</sub>Ce<sub>8</sub>Pt<sub>0.1</sub>Pd<sub>0.2</sub> ribbons; (b) the EDS mapping of (Pt<sub>0.1</sub>-Pd<sub>0.2</sub>)/CeO<sub>2</sub>

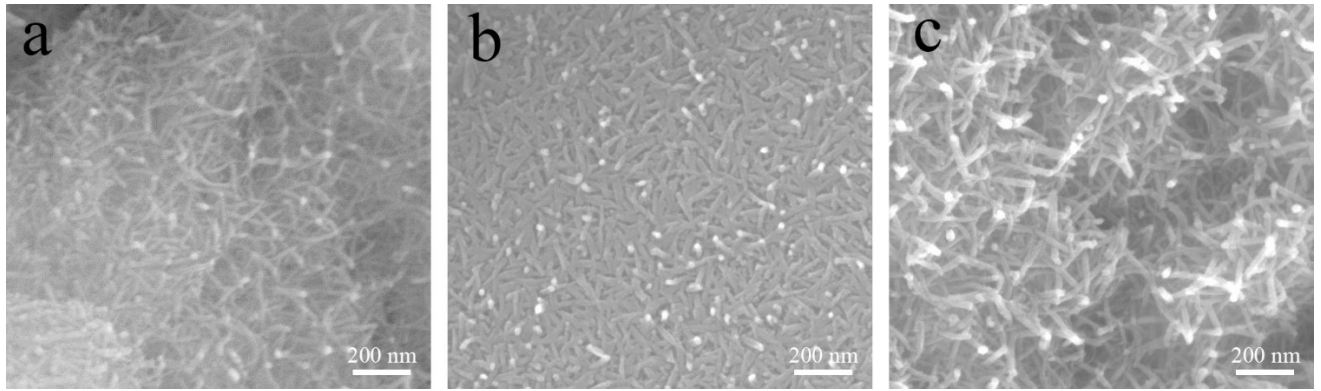

Fig. S3 SEM images of  $(\text{Pt}_{0.1}\text{-Pd}_{0.2})/\text{CeO}_2$  obtained at varied calcination temperature with different magnifications: (a) 0 °C, (b) 300 °C, (c) 500 °C

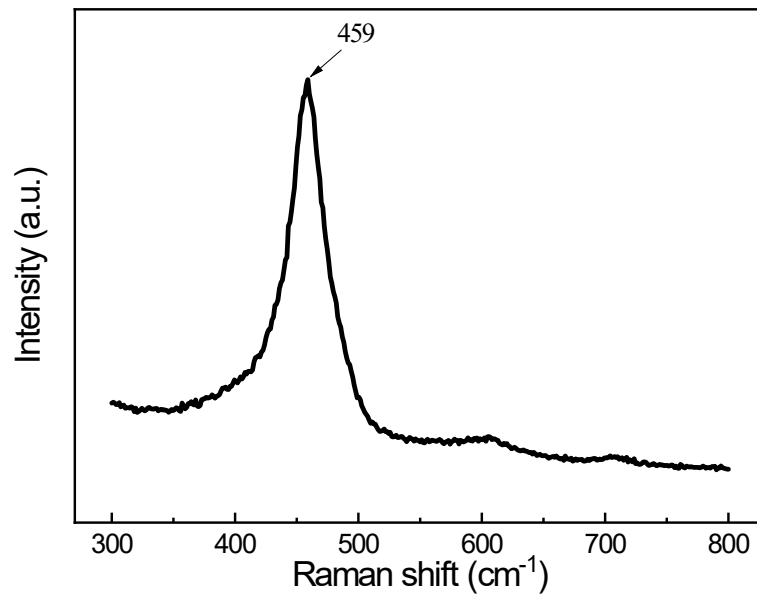

Fig. S4 The Raman spectrum of pure  $\text{CeO}_2$

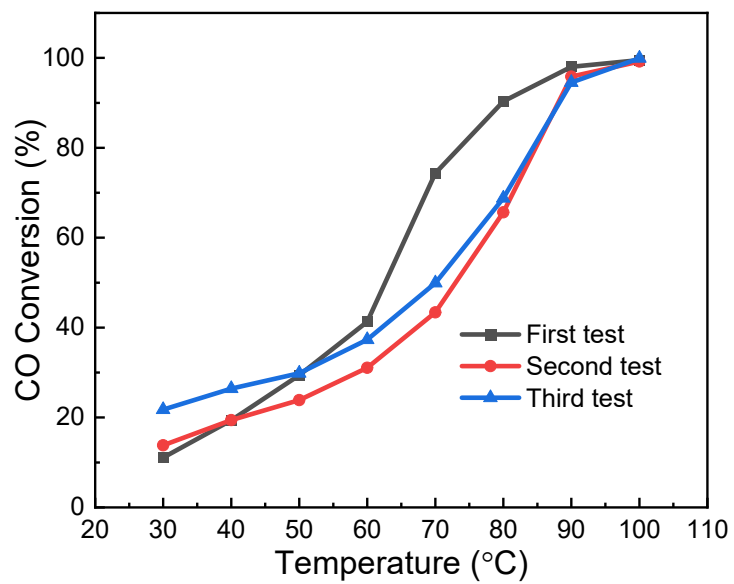

Fig. S5 The three repeated catalytic performance tests of (Pt<sub>0.2</sub>-Pd<sub>0.1</sub>)/CeO<sub>2</sub> catalyst

Table S1 Comparison on catalytic performance of (Pt<sub>0.1</sub>-Pd<sub>0.2</sub>)/CeO<sub>2</sub> with previous reports

| Sample                                                   | Preparation<br>Method         | Test condition                                            | T <sub>50</sub> (°C) | T <sub>99</sub> (°C) | Reference |
|----------------------------------------------------------|-------------------------------|-----------------------------------------------------------|----------------------|----------------------|-----------|
| Pd/Pr-CeO <sub>2</sub> -5%                               | Hydrothermal<br>synthesis     | 1% CO, 99% dry air                                        | /                    | 160                  | 41        |
| Ir/CeO <sub>2</sub>                                      | wet chemical<br>reduction     | 1% CO                                                     | /                    | 110                  | 42        |
| Pd/Ce <sub>0.7</sub> Zr <sub>0.3</sub> O <sub>2</sub>    | Hydrothermal<br>method        | 1.0% CO, 0.5% O <sub>2</sub> ,<br>N <sub>2</sub> balance, | /                    | 100                  | 43        |
| Co <sub>3</sub> O <sub>4</sub> @CeO <sub>2</sub>         | Hydrothermal<br>method        | 1% CO, 99% air                                            | /                    | 160                  | 44        |
| Pt/CeO <sub>2</sub>                                      | Electrostatic<br>Adsorption   | 1% CO, 20% O <sub>2</sub> , He<br>balance                 | 140                  | /                    | 45        |
| (Pt <sub>0.1</sub> -Pd <sub>0.2</sub> )/CeO <sub>2</sub> | Dealloying and<br>calcination | 1% CO, 10% O <sub>2</sub> ,<br>89% N <sub>2</sub>         | 75                   | 100                  | This work |
